# Supplementary material
Source: JCI journal article supplement (doi:10.1172/jci194290)
Supplement: sd1 [file 1]

1 SUPPLEMENTARY MATERIAL

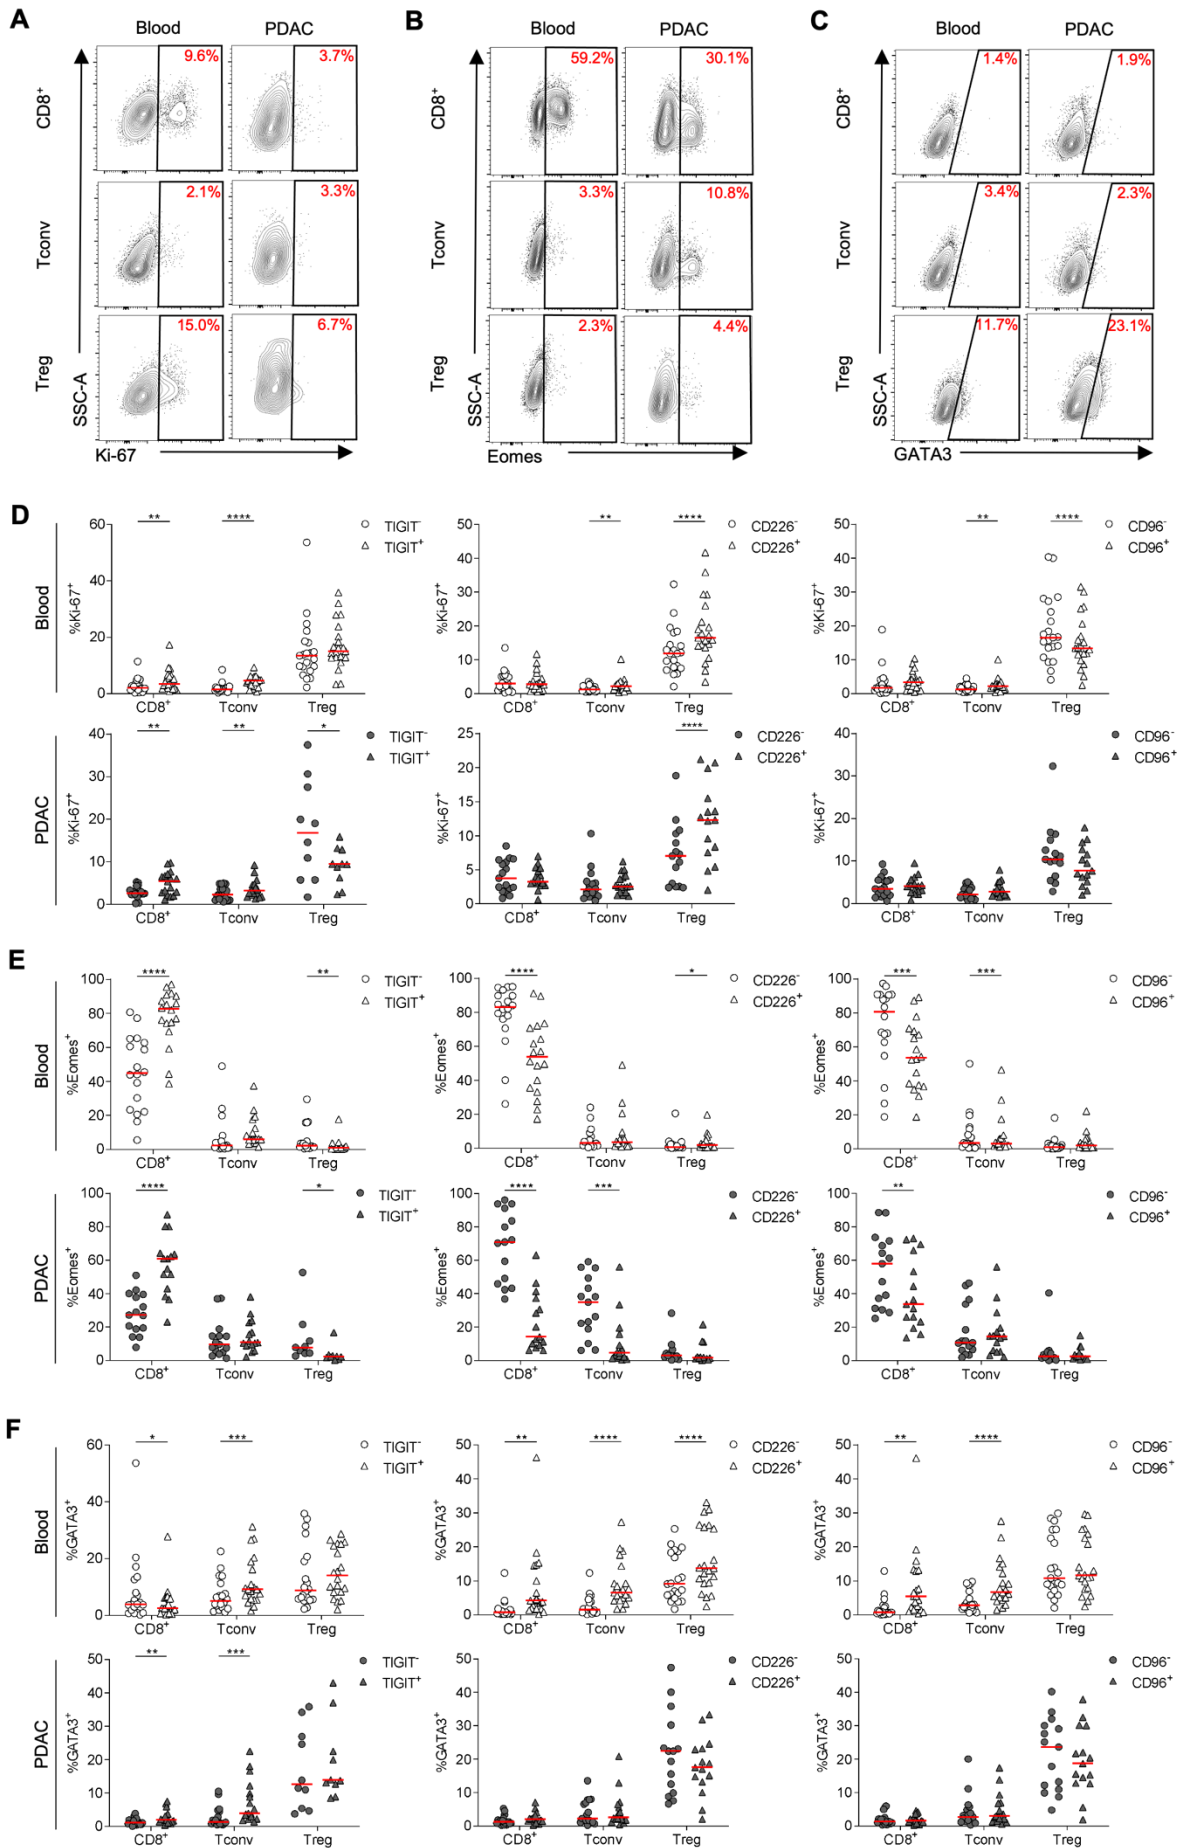

1 **Supplementary Figure S1.** (A) Representative contour flow plots for expression of Ki-67, (B)  
2 Eomes, and (C) GATA3 by indicated T cell subsets in blood and PDAC. The percentage of  
3 positive cells is indicated. (D) Percentage of Ki-67, (E) Eomes, and (F) GATA3 expression as  
4 a function of TIGIT, CD226 or CD96 expression (from left to right) for indicated T cell subsets  
5 in blood (top) and PDAC (bottom). Each point represents data from one patient. Medians are  
6 shown as horizontal red lines. Unpaired two-sided t tests with Holm-Šídák correction.  
7 \*,  $P < 0.05$ ; \*\*,  $P < 0.01$ ; \*\*\*,  $P < 0.001$ ; \*\*\*\*,  $P < 0.0001$ .

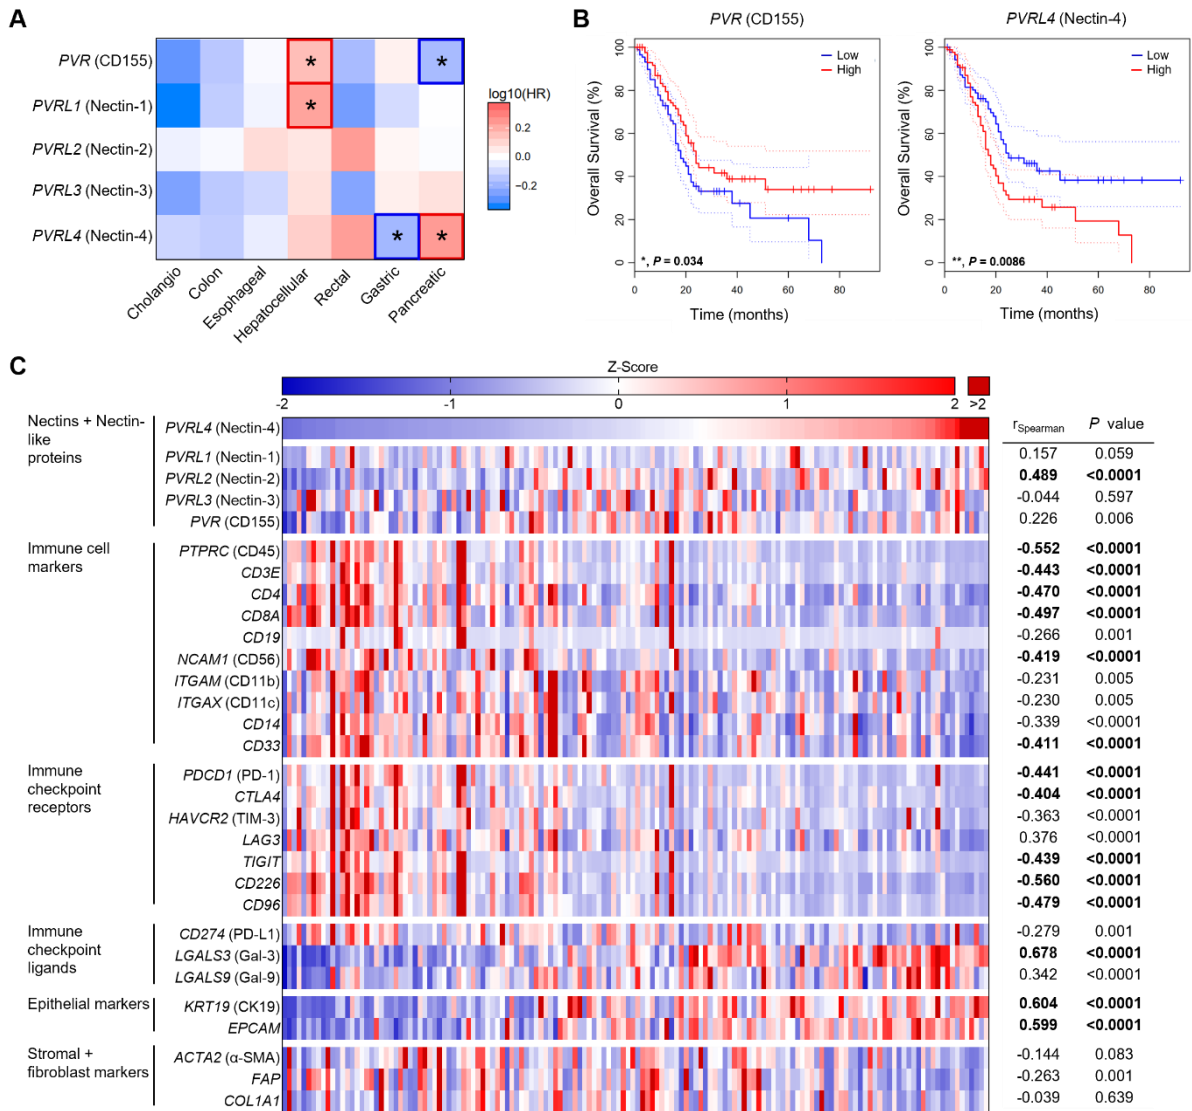

1  
2  
3  
4  
5  
6  
7  
8  
9  
10

**Supplementary Figure S2.** (A) Heatmap generated with GEPIA2 showing overall survival hazard ratios (HR) for expression of *PVR*, *PVRL1*, *PVRL2*, *PVRL3* and *PVRL4* in indicated gastrointestinal carcinomas. \*,  $P < 0.05$ . (B) Kaplan-Meier analysis generated with GEPIA2 for low versus high expression of *PVR* (left) or *PVRL4* (right) with the median as the threshold. HR and  $P$ -value of log rank test are indicated. (C) Heatmap showing standardized expression levels of genes of interest (Z-scores) in PDAC TCGA data. Each column represents one patient, ranked by *PVRL4* expression. The table shows the Spearman's rank correlation coefficients (rSpearman)

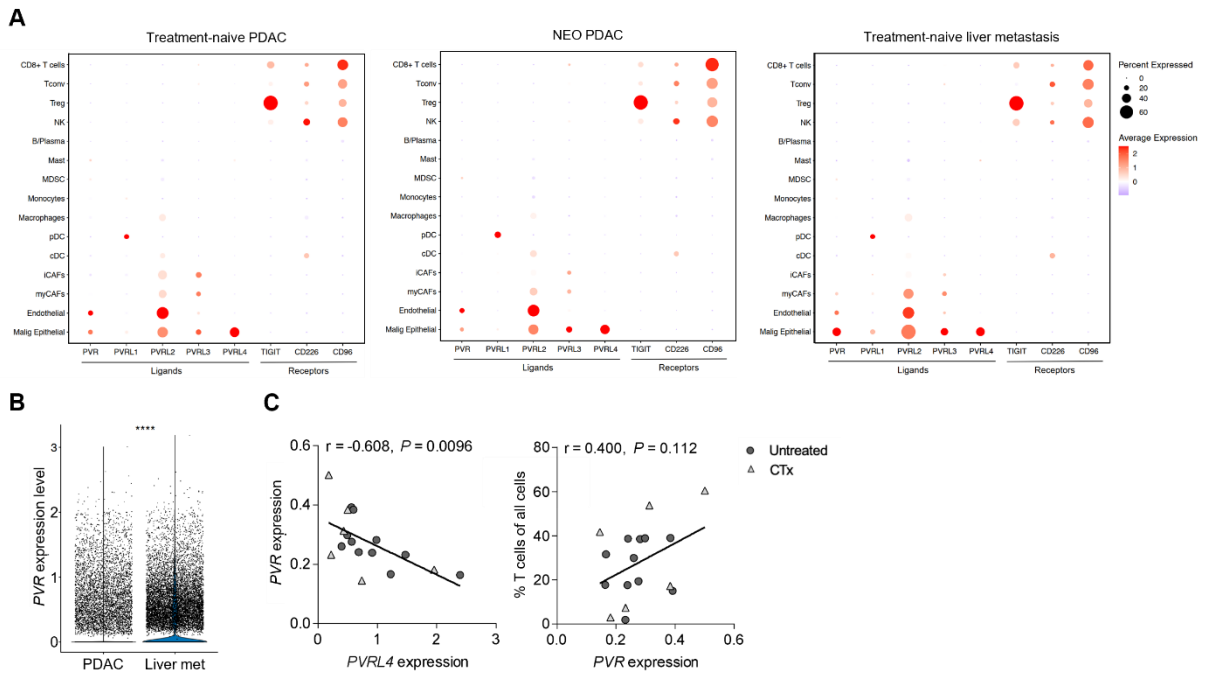

1

2 **Supplementary Figure S3.** (A) Dot plots depicting gene expression of TIGIT family receptors  
 3 and ligands in several compartments within treatment-naive PDAC (n = 11, left),  
 4 chemotherapeutically treated PDAC (n = 6, middle) and treatment-naive liver metastases  
 5 (n = 9, right). The dot size represents the percent of cells expressing the gene and the color  
 6 represents the average expression within those cells. (B) Violin plot of the expression of *PVR*  
 7 expression in all malignant epithelial cells in primary PDAC (n = 11) compared to PDAC liver  
 8 metastases (n = 9, right) from treatment-naive patients. Wilcoxon signed-rank test for  
 9 comparison of expression level. \*\*\*\*,  $P < 0.0001$ . (C) Scatterplots showing the correlation  
 10 between *PVR* and *PVRL4* expression by malignant epithelial cells and between *PVR*  
 11 expression in malignant epithelial cells and T cell infiltration as a percentage of T cells among  
 12 all analyzed cells per sample in treatment-naive (n = 11) and chemotherapeutically treated  
 13 (n = 6) primary PDAC. Pearson correlation coefficients and P-values are depicted. Each dot  
 14 represents one sample.

15

1 **Supplementary Table S1.** Patient characteristics of flow cytometry cohort.

| <b>Variable</b>    | <b>TIGIT<br/>(n = 84)<br/>n (%)</b> | <b>CD226 and CD96<br/>(n = 19)<br/>n (%)</b> |
|--------------------|-------------------------------------|----------------------------------------------|
| <b>Age (Years)</b> |                                     |                                              |
| Median (Range)     | 68 (35-84)                          | 70 (35-80)                                   |
| <b>Sex</b>         |                                     |                                              |
| Male               | 40 (48)                             | 12 (63)                                      |
| Female             | 44 (52)                             | 7 (37)                                       |
| <b>T Stage</b>     |                                     |                                              |
| 1                  | 6 (7)                               | 2 (10)                                       |
| 2                  | 42 (50)                             | 6 (32)                                       |
| 3                  | 32 (38)                             | 11 (58)                                      |
| 4                  | 4 (5)                               | 0 (0)                                        |
| <b>N Stage</b>     |                                     |                                              |
| 0                  | 23 (27)                             | 6 (31.5)                                     |
| 1                  | 34 (41)                             | 7 (37)                                       |
| 2                  | 27 (32)                             | 6 (31.5)                                     |
| <b>M Stage</b>     |                                     |                                              |
| 0                  | 70 (83)                             | 17 (89)                                      |
| 1                  | 14 (17)                             | 2 (11)                                       |
| <b>UICC</b>        |                                     |                                              |
| I                  | 10 (12)                             | 2 (11)                                       |
| II                 | 39 (46)                             | 10 (52)                                      |
| III                | 21 (25)                             | 5 (26)                                       |
| IV                 | 14 (17)                             | 2 (11)                                       |
| <b>Margin</b>      |                                     |                                              |
| R0                 | 65 (77)                             | 16 (84)                                      |
| R1                 | 14 (17)                             | 2 (11)                                       |
| Rx                 | 5 (6)                               | 1 (5)                                        |
| <b>NeoCTx</b>      |                                     |                                              |
| No                 | 55 (65)                             | 14 (74)                                      |
| Yes                | 29 (35)                             | 5 (26)                                       |

2

1 **Supplementary Table S2.** Pearson correlation coefficient (r) and P-values of correlation  
 2 between TIGIT, CD226 and CD96 expression of indicated blood T cell subsets in the flow  
 3 cytometry cohort.

|             |                  | TIGIT of                       |                              |                              | CD226 of                       |                               |                                | CD96 of                       |                               |                                |
|-------------|------------------|--------------------------------|------------------------------|------------------------------|--------------------------------|-------------------------------|--------------------------------|-------------------------------|-------------------------------|--------------------------------|
|             |                  | CD8 <sup>+</sup>               | Tconv                        | Treg                         | CD8 <sup>+</sup>               | Tconv                         | Treg                           | CD8 <sup>+</sup>              | Tconv                         | Treg                           |
| TIGIT<br>of | CD8 <sup>+</sup> |                                | r =<br>0.299<br>P =<br>0.147 | r =<br>0.560<br>P =<br>0.004 | r = -<br>0.079<br>P =<br>0.706 | r =<br>0.159<br>P =<br>0.449  | r = -<br>0.003<br>P =<br>0.990 | r =<br>0.123<br>P =<br>0.557  | r =<br>0.459<br>P =<br>0.021  | r =<br>0.295<br>P =<br>0.152   |
|             | Tconv            | r =<br>0.299<br>P =<br>0.147   |                              | r =<br>0.427<br>P =<br>0.033 | r =<br>0.208<br>P =<br>0.318   | r =<br>0.129<br>P =<br>0.540  | r =<br>0.169<br>P =<br>0.418   | r =<br>0.085<br>P =<br>0.686  | r =<br>0.083<br>P =<br>0.694  | r =<br>0.128<br>P =<br>0.543   |
|             | Treg             | r =<br>0.560<br>P =<br>0.004   | r =<br>0.427<br>P =<br>0.033 |                              | r =<br>0.442<br>P =<br>0.027   | r =<br>0.470<br>P =<br>0.018  | r =<br>0.366<br>P =<br>0.072   | r =<br>0.096<br>P =<br>0.649  | r =<br>0.277<br>P =<br>0.180  | r =<br>0.150<br>P =<br>0.473   |
| CD226<br>of | CD8 <sup>+</sup> | r = -<br>0.079<br>P =<br>0.706 | r =<br>0.208<br>P =<br>0.318 | r =<br>0.442<br>P =<br>0.027 |                                | r =<br>0.747<br>P =<br>0.0002 | r =<br>0.377<br>P =<br>0.063   | r =<br>-0.300<br>P =<br>0.145 | r =<br>-0.111<br>P =<br>0.599 | r =<br>-0.004<br>P =<br>0.984  |
|             | Tconv            | r =<br>0.159<br>P =<br>0.449   | r =<br>0.129<br>P =<br>0.540 | r =<br>0.470<br>P =<br>0.018 | r =<br>0.747<br>P =<br>0.0002  |                               | r =<br>0.551<br>P =<br>0.004   | r =<br>-0.155<br>P =<br>0.460 | r =<br>0.044<br>P =<br>0.836  | r = -<br>0.224<br>P =<br>0.317 |
|             | Treg             | r = -<br>0.003<br>P =<br>0.990 | r =<br>0.169<br>P =<br>0.418 | r =<br>0.366<br>P =<br>0.072 | r =<br>0.377<br>P =<br>0.063   | r =<br>0.551<br>P =<br>0.004  |                                | r =<br>0.130<br>P =<br>0.537  | r =<br>0.166<br>P =<br>0.427  | r =<br>0.191<br>P =<br>0.360   |
| CD96<br>of  | CD8 <sup>+</sup> | r =<br>0.123<br>P =<br>0.557   | r =<br>0.085<br>P =<br>0.686 | r =<br>0.096<br>P =<br>0.649 | r =<br>-0.300<br>P =<br>0.145  | r =<br>-0.155<br>P =<br>0.460 | r =<br>0.130<br>P =<br>0.537   |                               | r =<br>0.520<br>P =<br>0.008  | r =<br>0.440<br>P =<br>0.028   |
|             | Tconv            | r =<br>0.459<br>P =<br>0.021   | r =<br>0.083<br>P =<br>0.694 | r =<br>0.277<br>P =<br>0.180 | r =<br>-0.111<br>P =<br>0.599  | r =<br>0.044<br>P =<br>0.836  | r =<br>0.166<br>P =<br>0.427   | r =<br>0.520<br>P =<br>0.008  |                               | r =<br>0.875<br>P <<br>0.0001  |
|             | Treg             | r =<br>0.295<br>P =<br>0.152   | r =<br>0.128<br>P =<br>0.543 | r =<br>0.150<br>P =<br>0.473 | r =<br>-0.004<br>P =<br>0.984  | r =<br>0.034<br>P =<br>0.872  | r =<br>0.191<br>P =<br>0.360   | r =<br>0.440<br>P =<br>0.028  | r =<br>0.875<br>P <<br>0.0001 |                                |

4

1 **Supplementary Table S3.** Pearson correlation coefficient (*r*) and *P*-values of correlation  
 2 between TIGIT, CD226 and CD96 expression of indicated PDAC-infiltrating T cell subsets in  
 3 flow cytometry.

|             |                  | TIGIT of                                    |                                             |                                             | CD226 of                                    |                                             |                                             | CD96 of                                     |                                             |                                             |
|-------------|------------------|---------------------------------------------|---------------------------------------------|---------------------------------------------|---------------------------------------------|---------------------------------------------|---------------------------------------------|---------------------------------------------|---------------------------------------------|---------------------------------------------|
|             |                  | CD8 <sup>+</sup>                            | Tconv                                       | Treg                                        | CD8 <sup>+</sup>                            | Tconv                                       | Treg                                        | CD8 <sup>+</sup>                            | Tconv                                       | Treg                                        |
| TIGIT<br>of | CD8 <sup>+</sup> |                                             | <i>r</i> =<br>0.682<br><i>P</i> =<br>0.001  | <i>r</i> =<br>0.621<br><i>P</i> =<br>0.005  | <i>r</i> =<br>-0.625<br><i>P</i> =<br>0.003 | <i>r</i> =<br>-0.379<br><i>P</i> =<br>0.099 | <i>r</i> =<br>-0.034<br><i>P</i> =<br>0.891 | <i>r</i> =<br>0.190<br><i>P</i> =<br>0.422  | <i>r</i> =<br>0.076<br><i>P</i> =<br>0.750  | <i>r</i> =<br>0.041<br><i>P</i> =<br>0.869  |
|             | Tconv            | <i>r</i> =<br>0.682<br><i>P</i> =<br>0.001  |                                             | <i>r</i> =<br>0.782<br><i>P</i> <<br>0.0001 | <i>r</i> =<br>-0.406<br><i>P</i> =<br>0.076 | <i>r</i> =<br>-0.478<br><i>P</i> =<br>0.033 | <i>r</i> =<br>-0.345<br><i>P</i> =<br>0.148 | <i>r</i> =<br>0.469<br><i>P</i> =<br>0.037  | <i>r</i> =<br>0.326<br><i>P</i> =<br>0.160  | <i>r</i> =<br>0.236<br><i>P</i> =<br>0.331  |
|             | Treg             | <i>r</i> =<br>0.621<br><i>P</i> =<br>0.005  | <i>r</i> =<br>0.782<br><i>P</i> <<br>0.0001 |                                             | <i>r</i> =<br>-0.290<br><i>P</i> =<br>0.229 | <i>r</i> =<br>-0.328<br><i>P</i> =<br>0.170 | <i>r</i> =<br>-0.486<br><i>P</i> =<br>0.035 | <i>r</i> =<br>0.226<br><i>P</i> =<br>0.353  | <i>r</i> =<br>0.291<br><i>P</i> =<br>0.228  | <i>r</i> =<br>0.209<br><i>P</i> =<br>0.390  |
| CD226<br>of | CD8 <sup>+</sup> | <i>r</i> =<br>-0.625<br><i>P</i> =<br>0.003 | <i>r</i> =<br>-0.406<br><i>P</i> =<br>0.076 | <i>r</i> =<br>-0.290<br><i>P</i> =<br>0.229 |                                             | <i>r</i> =<br>0.565<br><i>P</i> =<br>0.009  | <i>r</i> =<br>0.142<br><i>P</i> =<br>0.563  | <i>r</i> =<br>0.026<br><i>P</i> =<br>0.914  | <i>r</i> =<br>0.279<br><i>P</i> =<br>0.233  | <i>r</i> =<br>0.318<br><i>P</i> =<br>0.185  |
|             | Tconv            | <i>r</i> =<br>-0.379<br><i>P</i> =<br>0.099 | <i>r</i> =<br>-0.478<br><i>P</i> =<br>0.033 | <i>r</i> =<br>-0.328<br><i>P</i> =<br>0.170 | <i>r</i> =<br>0.565<br><i>P</i> =<br>0.009  |                                             | <i>r</i> =<br>0.617<br><i>P</i> =<br>0.005  | <i>r</i> =<br>-0.209<br><i>P</i> =<br>0.376 | <i>r</i> =<br>0.025<br><i>P</i> =<br>0.917  | <i>r</i> =<br>-0.111<br><i>P</i> =<br>0.651 |
|             | Treg             | <i>r</i> =<br>-0.034<br><i>P</i> =<br>0.891 | <i>r</i> =<br>-0.345<br><i>P</i> =<br>0.148 | <i>r</i> =<br>-0.486<br><i>P</i> =<br>0.035 | <i>r</i> =<br>0.142<br><i>P</i> =<br>0.563  | <i>r</i> =<br>0.617<br><i>P</i> =<br>0.005  |                                             | <i>r</i> =<br>-0.284<br><i>P</i> =<br>0.239 | <i>r</i> =<br>-0.324<br><i>P</i> =<br>0.176 | <i>r</i> =<br>-0.360<br><i>P</i> =<br>0.130 |
| CD96<br>of  | CD8 <sup>+</sup> | <i>r</i> =<br>0.190<br><i>P</i> =<br>0.422  | <i>r</i> =<br>0.469<br><i>P</i> =<br>0.037  | <i>r</i> =<br>0.226<br><i>P</i> =<br>0.353  | <i>r</i> =<br>0.026<br><i>P</i> =<br>0.914  | <i>r</i> =<br>-0.209<br><i>P</i> =<br>0.376 | <i>r</i> =<br>-0.284<br><i>P</i> =<br>0.239 |                                             | <i>r</i> =<br>0.874<br><i>P</i> <<br>0.0001 | <i>r</i> =<br>0.751<br><i>P</i> =<br>0.0002 |
|             | Tconv            | <i>r</i> =<br>0.076<br><i>P</i> =<br>0.750  | <i>r</i> =<br>0.326<br><i>P</i> =<br>0.160  | <i>r</i> =<br>0.291<br><i>P</i> =<br>0.228  | <i>r</i> =<br>0.279<br><i>P</i> =<br>0.233  | <i>r</i> =<br>0.025<br><i>P</i> =<br>0.917  | <i>r</i> =<br>-0.324<br><i>P</i> =<br>0.176 | <i>r</i> =<br>0.874<br><i>P</i> <<br>0.0001 |                                             | <i>r</i> =<br>0.835<br><i>P</i> <<br>0.0001 |
|             | Treg             | <i>r</i> =<br>0.041<br><i>P</i> =<br>0.869  | <i>r</i> =<br>0.236<br><i>P</i> =<br>0.331  | <i>r</i> =<br>0.209<br><i>P</i> =<br>0.390  | <i>r</i> =<br>0.318<br><i>P</i> =<br>0.185  | <i>r</i> =<br>-0.111<br><i>P</i> =<br>0.651 | <i>r</i> =<br>-0.360<br><i>P</i> =<br>0.130 | <i>r</i> =<br>0.751<br><i>P</i> =<br>0.0002 | <i>r</i> =<br>0.835<br><i>P</i> <<br>0.0001 |                                             |

4

1 **Supplementary Table S4.** Correlation of TIGIT ligands with markers of interest based on the  
 2 TCGA data set. Spearman's rank correlation coefficient (r).  $r \leq -0.4$  or  $r \geq 0.4$  are highlighted  
 3 in bold.

| Background                       | Gene          | PVRL1  |         | PVRL2        |                   | PVRL3  |         | PVR          |                   |
|----------------------------------|---------------|--------|---------|--------------|-------------------|--------|---------|--------------|-------------------|
|                                  |               | r      | P-Value | r            | P-Value           | r      | P-Value | r            | P-Value           |
| Nectins and Nectin-like proteins | <i>PVRL1</i>  |        |         | 0.202        | 0.014             | 0.176  | 0.034   | 0.367        | <0.0001           |
|                                  | <i>PVRL2</i>  | 0.202  | 0.014   |              |                   | -0.022 | 0.790   | <b>0.486</b> | <b>&lt;0.0001</b> |
|                                  | <i>PVRL3</i>  | 0.176  | 0.034   | -0.022       | 0.790             |        |         | 0.248        | 0.003             |
|                                  | <i>PVRL4</i>  | 0.157  | 0.059   | <b>0.489</b> | <b>&lt;0.0001</b> | -0.044 | 0.597   | 0.226        | 0.006             |
|                                  | <i>PVR</i>    | 0.367  | <0.0001 | <b>0.486</b> | <b>&lt;0.0001</b> | 0.248  | 0.003   |              |                   |
| Immune cell markers              | <i>PTPRC</i>  | -0.131 | 0.114   | -0.332       | <0.0001           | 0.139  | 0.095   | -0.094       | 0.258             |
|                                  | <i>CD3E</i>   | -0.137 | 0.099   | -0.198       | 0.017             | 0.027  | 0.742   | -0.131       | 0.115             |
|                                  | <i>CD4</i>    | -0.074 | 0.377   | 0.092        | 0.272             | 0.092  | 0.268   | -0.107       | 0.200             |
|                                  | <i>CD8A</i>   | -0.147 | 0.078   | -0.278       | 0.001             | 0.084  | 0.314   | -0.161       | 0.052             |
|                                  | <i>CD19</i>   | -0.068 | 0.414   | -0.102       | 0.220             | 0.018  | 0.833   | -0.066       | 0.430             |
|                                  | <i>NCAM1</i>  | -0.129 | 0.122   | -0.217       | 0.009             | 0.153  | 0.065   | -0.115       | 0.166             |
|                                  | <i>ITGAM</i>  | -0.087 | 0.298   | -0.142       | 0.088             | 0.074  | 0.377   | -0.084       | 0.311             |
|                                  | <i>ITGAX</i>  | -0.127 | 0.128   | -0.009       | 0.915             | -0.124 | 0.137   | -0.149       | 0.074             |
|                                  | <i>CD14</i>   | 0.016  | 0.844   | -0.083       | 0.318             | -0.029 | 0.727   | -0.100       | 0.229             |
| <i>FCGR3A</i>                    | 0.063         | 0.451  | -0.092  | 0.272        | 0.111             | 0.183  | 0.054   | 0.519        |                   |
| Immune checkpoint receptors      | <i>PDCD1</i>  | -0.103 | 0.216   | -0.107       | 0.198             | -0.054 | 0.519   | -0.067       | 0.420             |
|                                  | <i>CTLA4</i>  | -0.113 | 0.173   | -0.151       | 0.070             | -0.076 | 0.360   | -0.055       | 0.510             |
|                                  | <i>HAVCR2</i> | 0.017  | 0.843   | -0.084       | 0.313             | 0.007  | 0.936   | -0.041       | 0.623             |
|                                  | <i>LAG3</i>   | -0.083 | 0.318   | -0.142       | 0.087             | 0.018  | 0.827   | -0.064       | 0.444             |
|                                  | <i>TIGIT</i>  | -0.076 | 0.364   | -0.222       | 0.007             | -0.007 | 0.931   | -0.092       | 0.270             |
|                                  | <i>CD226</i>  | -0.123 | 0.141   | -0.293       | 0.000             | 0.184  | 0.026   | -0.103       | 0.217             |
|                                  | <i>CD96</i>   | -0.160 | 0.053   | -0.224       | 0.007             | 0.072  | 0.387   | -0.125       | 0.133             |
| Immune checkpoint ligands        | <i>CD274</i>  | 0.186  | 0.025   | -0.109       | 0.192             | 0.246  | 0.003   | 0.153        | 0.066             |
|                                  | <i>LGALS3</i> | 0.128  | 0.124   | <b>0.406</b> | <b>&lt;0.0001</b> | 0.092  | 0.267   | 0.274        | 0.001             |
|                                  | <i>LGALS9</i> | -0.025 | 0.761   | <b>0.482</b> | <b>&lt;0.0001</b> | -0.028 | 0.733   | 0.165        | 0.046             |
| Epithelial marker                | <i>KRT19</i>  | 0.301  | <0.0001 | <b>0.552</b> | <b>&lt;0.0001</b> | 0.099  | 0.233   | 0.328        | <0.0001           |
|                                  | <i>EPCAM</i>  | 0.229  | 0.005   | <b>0.435</b> | <b>&lt;0.0001</b> | 0.152  | 0.067   | <b>0.409</b> | <b>&lt;0.0001</b> |
| Stromal + Fibroblast marker      | <i>ACTA2</i>  | -0.114 | 0.172   | -0.035       | 0.674             | 0.107  | 0.200   | 0.015        | 0.860             |
|                                  | <i>FAP</i>    | 0.063  | 0.450   | -0.167       | 0.044             | 0.227  | 0.006   | 0.090        | 0.282             |
|                                  | <i>COL1A1</i> | 0.051  | 0.537   | 0.004        | 0.966             | 0.087  | 0.299   | 0.016        | 0.846             |

4

1 **Supplementary Table S5.** Patient characteristics of CD155 and Nectin-4  
 2 immunohistochemistry cohort and association with IRS. Fisher's exact test was used to  
 3 compare the IRS distribution for the respective clinicopathologic characteristic.

| Variable       | CD155 |     |      |         | Nectin-4 |     |      |         |
|----------------|-------|-----|------|---------|----------|-----|------|---------|
|                | n     | Low | High | P-Value | n        | Low | High | P-Value |
| <b>Age</b>     |       |     |      |         |          |     |      |         |
| <68 yrs        | 36    | 27  | 9    | 0.788   | 35       | 18  | 17   | 0.478   |
| ≥68 yrs        | 33    | 23  | 10   |         | 33       | 14  | 19   |         |
| <b>Sex</b>     |       |     |      |         |          |     |      |         |
| Male           | 33    | 25  | 8    | 0.600   | 32       | 13  | 19   | 0.342   |
| Female         | 36    | 25  | 11   |         | 36       | 19  | 17   |         |
| <b>T Stage</b> |       |     |      |         |          |     |      |         |
| 1              | 6     | 3   | 3    | 0.547   | 6        | 1   | 5    | 0.371   |
| 2              | 32    | 23  | 9    |         | 32       | 15  | 17   |         |
| 3              | 27    | 21  | 6    |         | 26       | 13  | 13   |         |
| 4              | 4     | 3   | 1    |         | 4        | 3   | 1    |         |
| <b>N Stage</b> |       |     |      |         |          |     |      |         |
| 0              | 20    | 12  | 8    | 0.183   | 20       | 9   | 11   | 0.681   |
| 1              | 29    | 24  | 5    |         | 28       | 15  | 13   |         |
| 2              | 20    | 14  | 6    |         | 20       | 8   | 12   |         |
| <b>M Stage</b> |       |     |      |         |          |     |      |         |
| 0              | 57    | 43  | 14   | 0.289   | 56       | 29  | 27   | 0.118   |
| 1              | 12    | 7   | 5    |         | 12       | 3   | 9    |         |
| <b>UICC</b>    |       |     |      |         |          |     |      |         |
| I              | 10    | 5   | 5    | 0.116   | 10       | 5   | 5    | 0.332   |
| II             | 31    | 26  | 5    |         | 30       | 17  | 13   |         |
| III            | 16    | 12  | 4    |         | 16       | 7   | 9    |         |
| IV             | 12    | 7   | 5    |         | 12       | 3   | 9    |         |
| <b>NeoCTx</b>  |       |     |      |         |          |     |      |         |
| No             | 43    | 33  | 10   | 0.406   | 42       | 19  | 23   | 0.804   |
| Yes            | 26    | 17  | 9    |         | 26       | 13  | 13   |         |

4

5

1 **Supplementary Table S6.** Antibodies used for flow cytometry.

| <b>Marker</b> | <b>Clone</b> | <b>Manufacturer</b> | <b>Catalog #</b> |
|---------------|--------------|---------------------|------------------|
| CD45          | HI30         | BD Biosciences      | 563792           |
| CD3           | UCHT1        | BD Biosciences      | 612940           |
| CD8           | SK1          | BD Biosciences      | 564912           |
| CD4           | RPA-T4       | BD Biosciences      | 560158           |
| FOXP3         | 206D         | BioLegend           | 320126           |
| TIGIT         | A15153G      | BioLegend           | 372710           |
| CD226         | 11A8         | BioLegend           | 338312           |
| CD96          | 6F9          | BD Biosciences      | 562379           |
| Ki-67         | B56          | BD Biosciences      | 563756           |
| GATA3         | L50-823      | BD Biosciences      | 565449           |
| Eomes         | WD1928       | Invitrogen          | 11-4877-42       |

2
